# Supplementary material for: A microfluidics platform for combinatorial drug screening on cancer biopsies
Source: PubMed Central journal article supplement (PMC6015045; doi:10.1038/s41467-018-04919-w), 2018-06-22
Supplement: 41467_2018_4919_MOESM3_ESM.pdf [file 41467_2018_4919_MOESM3_ESM.pdf]

## Description of Additional Supplementary Files

### **File Name: Supplementary Movie 1**

**Description:** Braille valve in action. A cross-section of a microfluidic chip made entirely of PDMS (bonded to a PDMS membrane) is mounted on top of a Braille display. Upon actuation of the pins, the channels (showing rectangular cross sections) can be closed off completely.

### **File Name: Supplementary Movie 2**

**Description:** Mineral oil spacing. At the outlet of the microfluidic chip, mineral oil is injected through a perpendicular channel (see design in Fig 1B). This results in regular spacing of the sample plugs within the fluorinated carrier phase.

### **File Name: Supplementary Movie 3**

**Description:** Generation of barcodes. General principle of sample barcoding. Binary digits in form of small plugs with two different concentrations of a fluorescence dye (high/low) are generated in between the larger sample plugs.
